# Supplementary material
Source: Springer Nature journal article supplement (https://www.springermedizin.de/resource/supplementary/12985_2010_861_MOESM3_ESM.pdf/9608610)

1

2

3

M

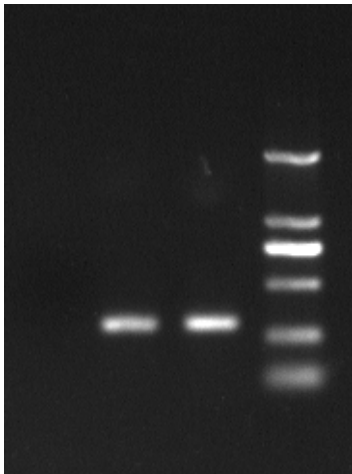

← 2000

← 1000

← 750

← 500

← 250

← 100

Supplement: MOESM3 [file 9608610]
